# Supplementary material for: Characterization of Recurrent Relevant Genes Reveals a Novel Role of RPL36A in Radioresistant Oral Squamous Cell Carcinoma
Source: MDPI journal article supplement (doi:10.3390/cancers13225623), 2021-11-10
Supplement: s1 [file s1]

**Supplementary Table S2. Results of univariate and multivariate analyses of disease-specific survival of 136 OSCC patients with radiotherapy from the validation-testing Taiwanese cohort**

| Variables               | Univariate   |             |                    | Multivariate |             |                    |
|-------------------------|--------------|-------------|--------------------|--------------|-------------|--------------------|
|                         | Hazard ratio | 95% CI      | <i>p</i> value     | Hazard ratio | 95% CI      | <i>p</i> value     |
| Age, years <sup>a</sup> | 0.972        | 0.945-1.000 | 0.045 <sup>b</sup> | 0.973        | 0.945-1.003 | 0.073              |
| Sex                     |              |             |                    |              |             |                    |
| Male                    | Reference    |             |                    | Reference    |             |                    |
| Female                  | 1.444        | 0.521-4.003 | 0.502              | 0.710        | 0.131-3.839 | 0.691              |
| Smoking                 |              |             |                    |              |             |                    |
| No                      | Reference    |             |                    | Reference    |             |                    |
| Yes                     | 0.628        | 0.226-1.741 | 0.402              | 0.395        | 0.068-2.289 | 0.300              |
| Overall TNM stage       |              |             |                    |              |             |                    |
| I-II                    | Reference    |             |                    | Reference    |             |                    |
| III-IV                  | 0.785        | 0.383-1.607 | 0.519              | 0.550        | 0.246-1.229 | 0.145              |
| Node classification     |              |             |                    |              |             |                    |
| n≤1                     | Reference    |             |                    | Reference    |             |                    |
| n>1                     | 1.843        | 1.084-3.133 | 0.025 <sup>b</sup> | 2.262        | 1.239-4.130 | 0.008 <sup>b</sup> |
| RPL36A                  |              |             |                    |              |             |                    |
| Low                     | Reference    |             |                    | Reference    |             |                    |
| High                    | 1.721        | 0.998-2.969 | 0.048 <sup>b</sup> | 1.782        | 1.021-3.111 | 0.042 <sup>b</sup> |

Abbreviations: CI, confidence interval; TNM, tumor, node, metastasis.

<sup>a</sup>Continuous variable, <sup>b</sup>Statistically significant.
