# Supplementary figures and images for: Characterization of Recurrent Relevant Genes Reveals a Novel Role of RPL36A in Radioresistant Oral Squamous Cell Carcinoma
Source: MDPI journal article supplement (doi:10.3390/cancers13225623), 2021-11-10

Fig. 4C

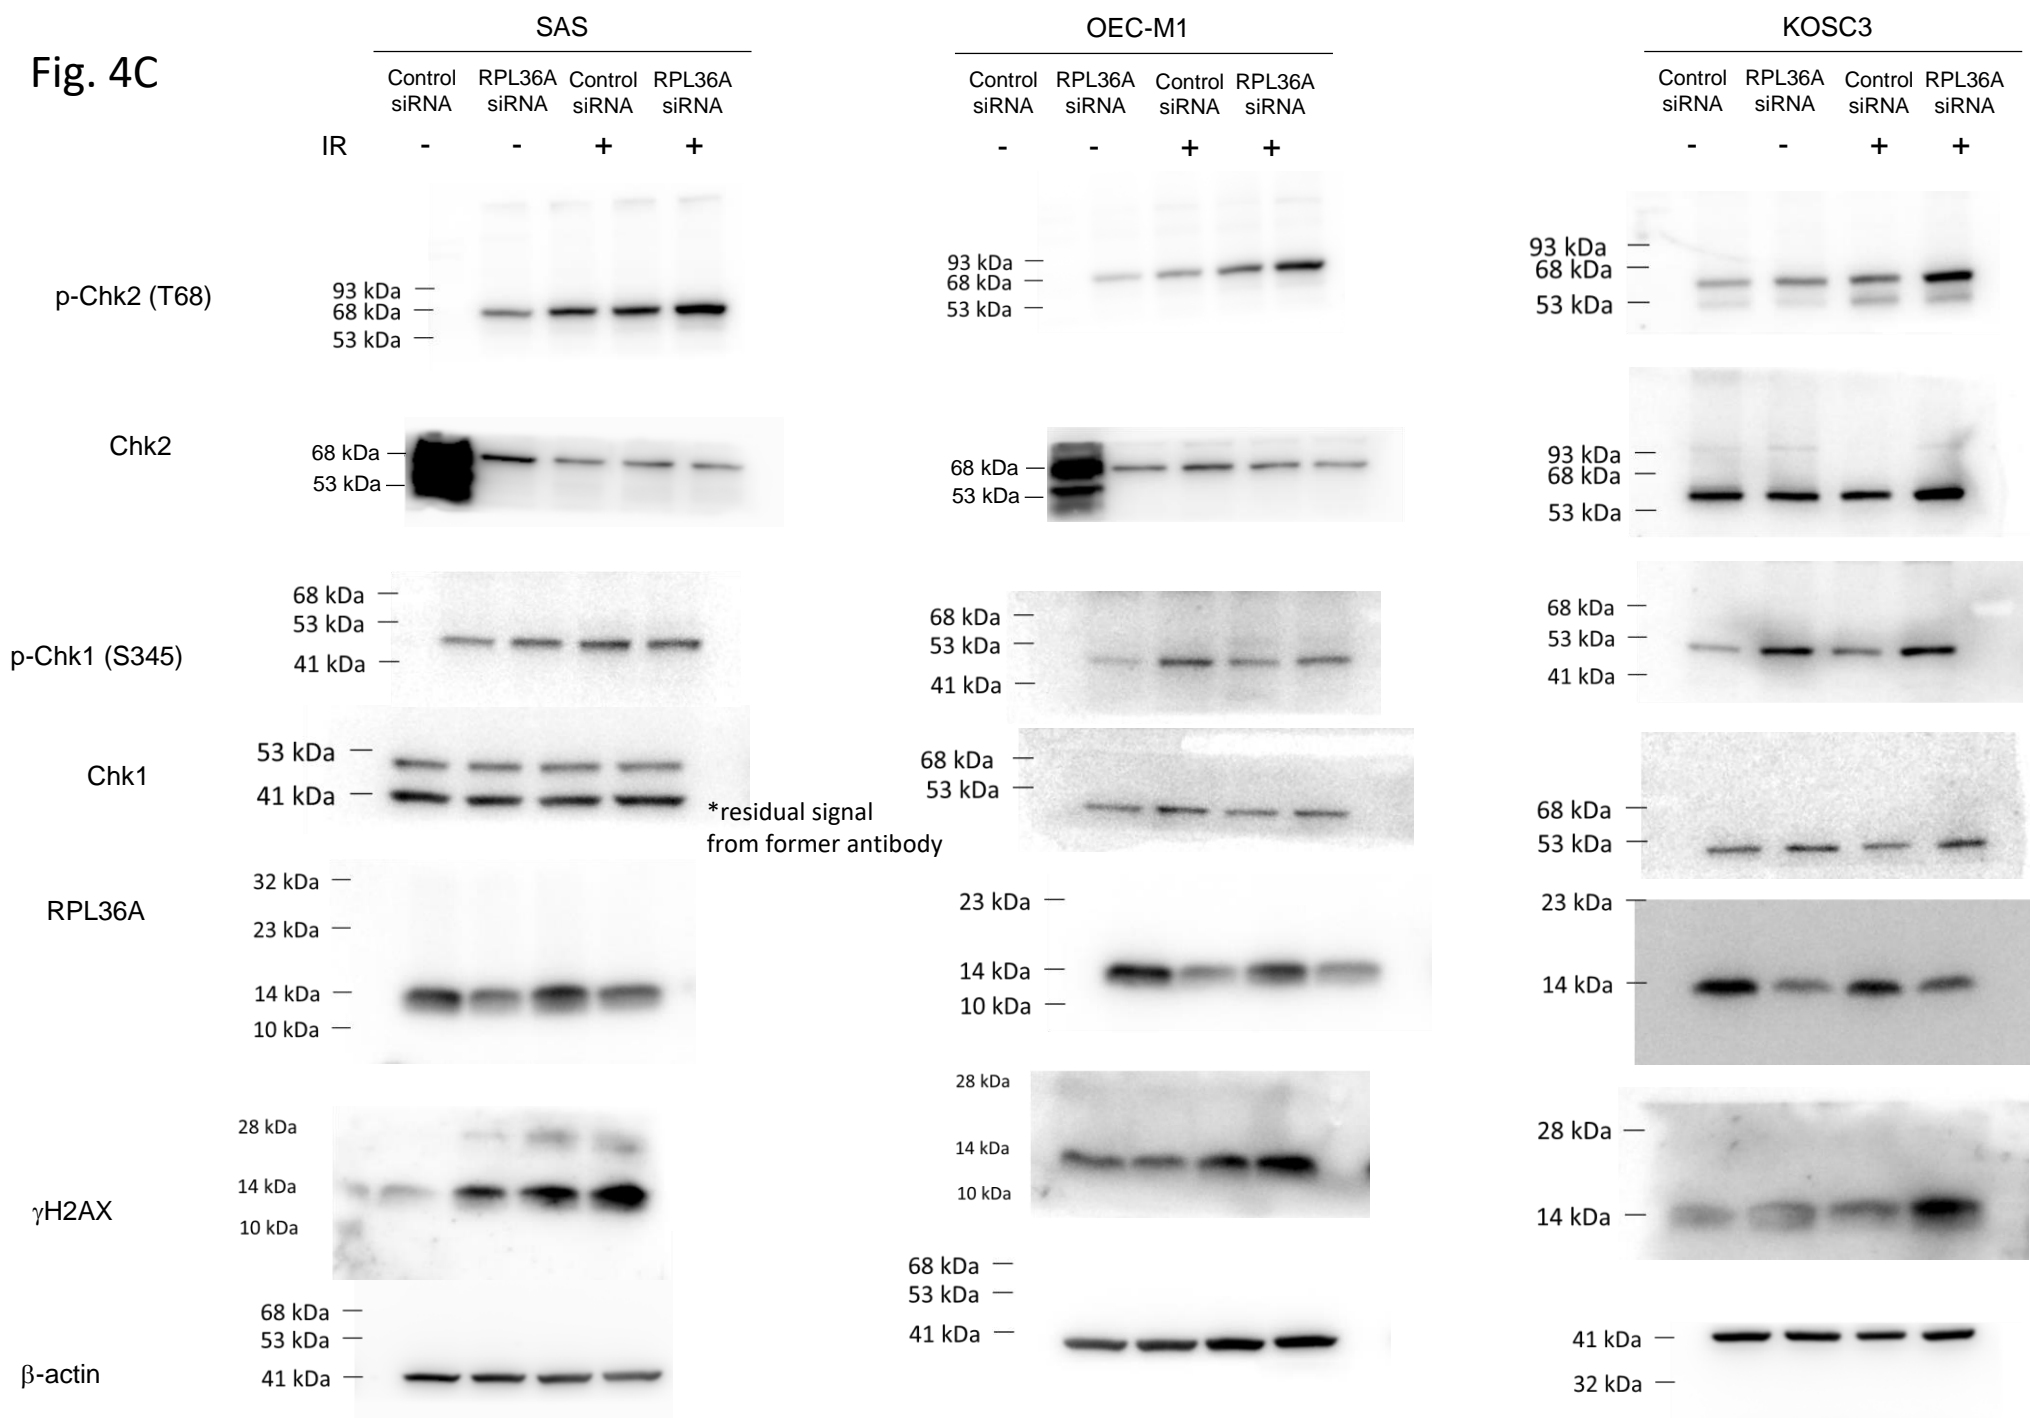

Fig. 5C

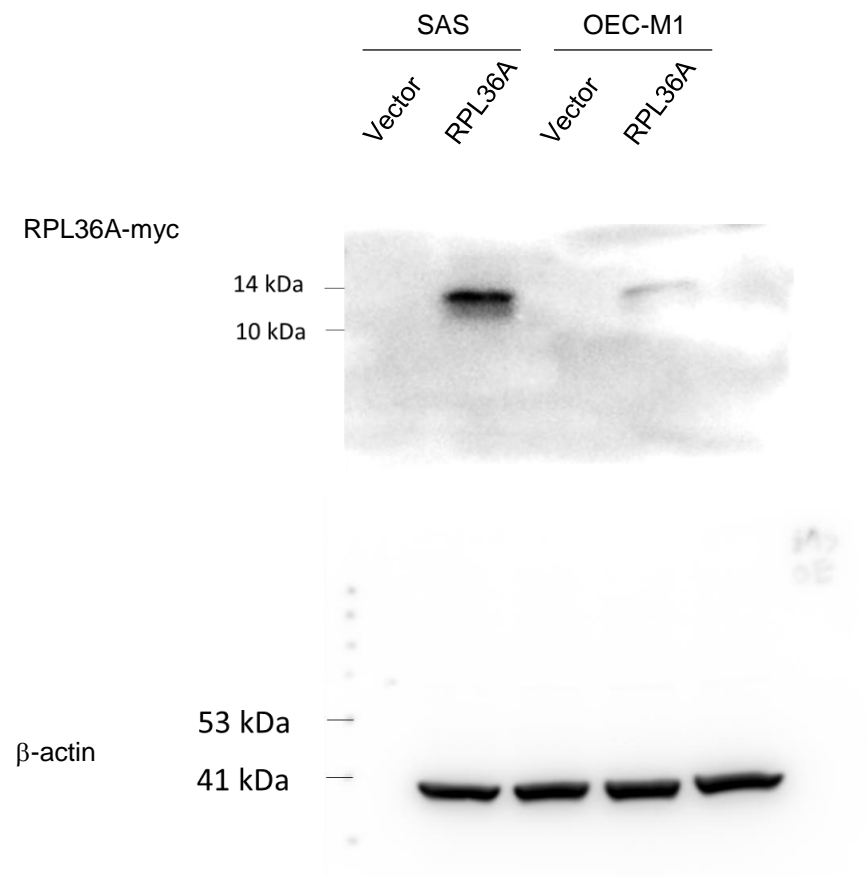

Supplement: s1 [file s1]
